# Supplementary material
Source: publisher figshare collection journal article supplement (https://tandf.figshare.com/articles/dataset/_/11822067)
Supplement: Supplementary file 1 [file 1]

## Supplement 1: Stimuli used in the experiment

### Stimuli are coded in the following:

Number: 01-20  
 Experimental Item / Filler: E / F  
 More / Fewer than half: M / F  
 Inside of / Outside of / None: I / O / N

Note that each of the filler items was presented twice, so that the number of experimental items and filler items was identical.

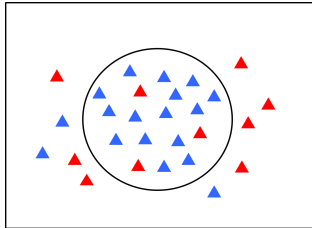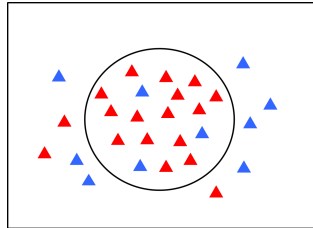

01EMI: Mehr als die Hälfte der Dreiecke sind blau, die innerhalb des Kreises sind.

01EMO: Mehr als die Hälfte der Dreiecke sind blau, die außerhalb des Kreises sind.

01EFI: Weniger als die Hälfte der Dreiecke sind blau, die innerhalb des Kreises sind.

01EFO: Weniger als die Hälfte der Dreiecke sind blau, die außerhalb des Kreises sind.

01FMN: Mehr als die Hälfte der Dreiecke sind blau.

01FFN: Weniger als die Hälfte der Dreiecke sind blau.

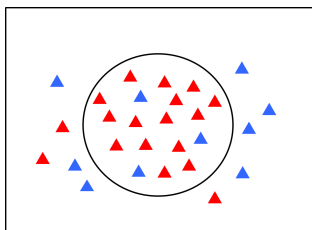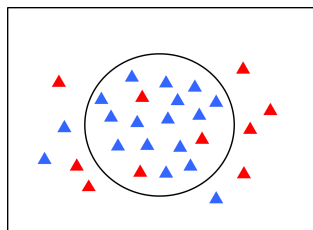

02EMI: Mehr als die Hälfte der Dreiecke sind rot, die innerhalb des Kreises sind.

02EMO: Mehr als die Hälfte der Dreiecke sind rot, die außerhalb des Kreises sind.

02EFI: Weniger als die Hälfte der Dreiecke sind rot, die innerhalb des Kreises sind.

02EFO: Weniger als die Hälfte der Dreiecke sind rot, die außerhalb des Kreises sind.

02FMN: Mehr als die Hälfte der Dreiecke sind rot.

02FFN: Weniger als die Hälfte der Dreiecke sind rot.

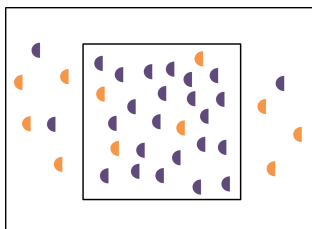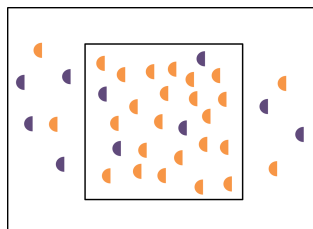

03EMI: Mehr als die Hälfte der Halbkreise sind lila, die innerhalb des Quadrats sind.

03EMO: Mehr als die Hälfte der Halbkreise sind lila, die außerhalb des Quadrats sind.

03EFI: Weniger als die Hälfte der Halbkreise sind lila, die innerhalb des Quadrats sind.

03EFO: Weniger als die Hälfte der Halbkreise sind lila, die außerhalb des Quadrats sind.

03FMN: Mehr als die Hälfte der Halbkreise sind lila.

03FFN: Weniger als die Hälfte der Halbkreise sind lila.

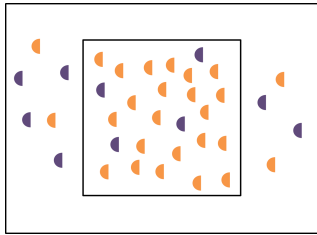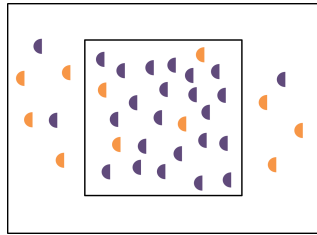

04EMI: Mehr als die Hälfte der Halbkreise sind orange, die innerhalb des Quadrats sind.

04EMO: Mehr als die Hälfte der Halbkreise sind orange, die außerhalb des Quadrats sind.

04EFI: Weniger als die Hälfte der Halbkreise sind orange, die innerhalb des Quadrats sind.

04EFO: Weniger als die Hälfte der Halbkreise sind orange, die außerhalb des Quadrats sind.

04FMN: Mehr als die Hälfte der Halbkreise sind orange.

04FFN: Weniger als die Hälfte der Halbkreise sind orange.

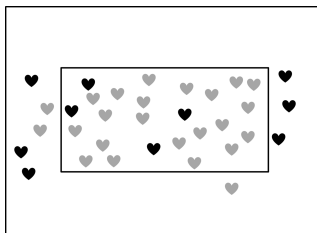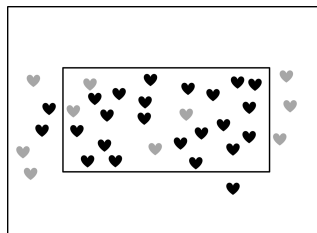

05EMI: Mehr als die Hälfte der Herzen sind grau, die innerhalb des Rechtecks sind.

05EMO: Mehr als die Hälfte der Herzen sind grau, die außerhalb des Rechtecks sind.

05EFI: Weniger als die Hälfte der Herzen sind grau, die innerhalb des Rechtecks sind.

05EFO: Weniger als die Hälfte der Herzen sind grau, die außerhalb des Rechtecks sind.

05FMN: Mehr als die Hälfte der Herzen sind grau.

05FFN: Weniger als die Hälfte der Herzen sind grau.

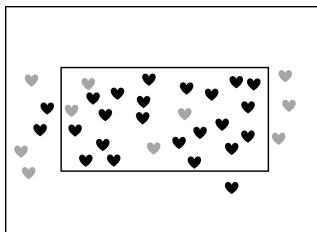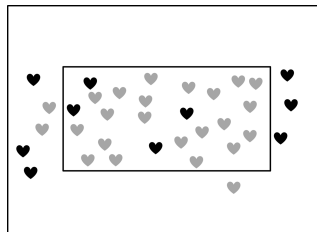

06EMI: Mehr als die Hälfte der Herzen sind schwarz, die innerhalb des Rechtecks sind.

06EMO: Mehr als die Hälfte der Herzen sind schwarz, die außerhalb des Rechtecks sind.

06EFI: Weniger als die Hälfte der Herzen sind schwarz, die innerhalb des Rechtecks sind.

06EFO: Weniger als die Hälfte der Herzen sind schwarz, die außerhalb des Rechtecks sind.

06FMN: Mehr als die Hälfte der Herzen sind schwarz.

06FFN: Weniger als die Hälfte der Herzen sind schwarz.

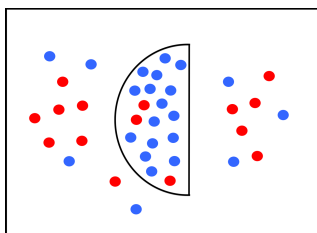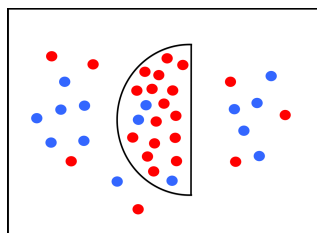

07EMI: Mehr als die Hälfte der Punkte sind blau, die innerhalb des Halbkreises sind.

07EMO: Mehr als die Hälfte der Punkte sind blau, die außerhalb des Halbkreises sind.

07EFI: Weniger als die Hälfte der Punkte sind blau, die innerhalb des Halbkreises sind.

07EFO: Weniger als die Hälfte der Punkte sind blau, die außerhalb des Halbkreises sind.

07FMN: Mehr als die Hälfte der Punkte sind blau.

07FFN: Weniger als die Hälfte der Punkte sind blau.

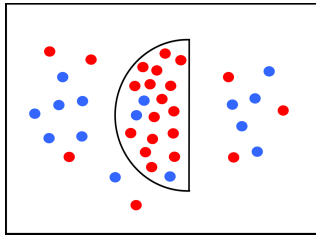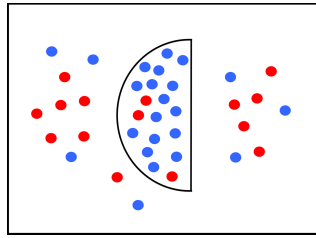

08EMI: Mehr als die Hälfte der Punkte sind rot, die innerhalb des Halbkreises sind.

08EMO: Mehr als die Hälfte der Punkte sind rot, die außerhalb des Halbkreises sind.

08EFI: Weniger als die Hälfte der Punkte sind rot, die innerhalb des Halbkreises sind.

08EFO: Weniger als die Hälfte der Punkte sind rot, die außerhalb des Halbkreises sind.

08FMN: Mehr als die Hälfte der Punkte sind rot.

08FFN: Weniger als die Hälfte der Punkte sind rot.

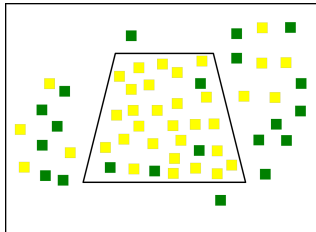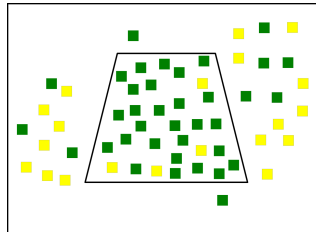

09EMI: Mehr als die Hälfte der Quadrate sind gelb, die innerhalb des Trapezes sind.

09EMO: Mehr als die Hälfte der Quadrate sind gelb, die außerhalb des Trapezes sind.

09EFI: Weniger als die Hälfte der Quadrate sind gelb, die innerhalb des Trapezes sind.

09EFO: Weniger als die Hälfte der Quadrate sind gelb, die außerhalb des Trapezes sind.

09FMN: Mehr als die Hälfte der Quadrate sind gelb.

09FFN: Weniger als die Hälfte der Quadrate sind gelb.

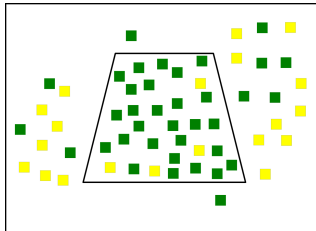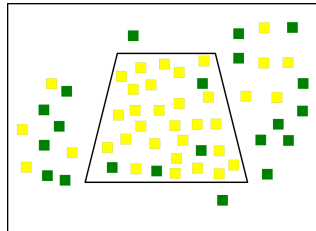

10EMI: Mehr als die Hälfte der Quadrate sind grün, die innerhalb des Trapezes sind.

10EMO: Mehr als die Hälfte der Quadrate sind grün, die außerhalb des Trapezes sind.

10EFI: Weniger als die Hälfte der Quadrate sind grün, die innerhalb des Trapezes sind.

10EFO: Weniger als die Hälfte der Quadrate sind grün, die außerhalb des Trapezes sind.

10FMN: Mehr als die Hälfte der Quadrate sind grün.

10FFN: Weniger als die Hälfte der Quadrate sind grün.

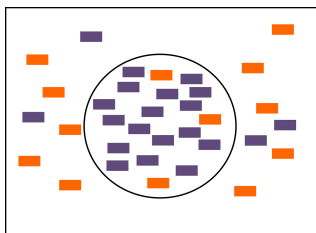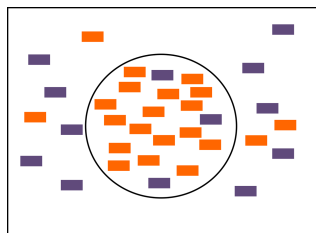

11EMI: Mehr als die Hälfte der Rechtecke sind lila, die innerhalb des Kreises sind.

11EMO: Mehr als die Hälfte der Rechtecke sind lila, die außerhalb des Kreises sind.

11EFI: Weniger als die Hälfte der Rechtecke sind lila, die innerhalb des Kreises sind.

11EFO: Weniger als die Hälfte der Rechtecke sind lila, die außerhalb des Kreises sind.

11FMN: Mehr als die Hälfte der Rechtecke sind lila.

11FFN: Weniger als die Hälfte der Rechtecke sind lila.

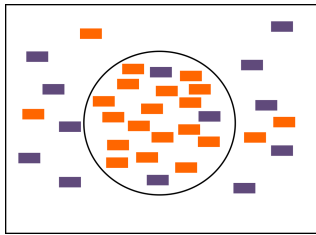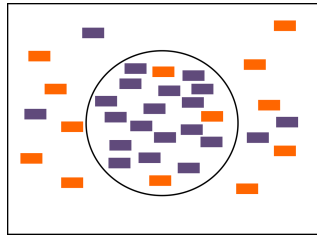

12EMI: Mehr als die Hälfte der Rechtecke sind orange, die innerhalb des Kreises sind.

12EMO: Mehr als die Hälfte der Rechtecke sind orange, die außerhalb des Kreises sind.

12EFI: Weniger als die Hälfte der Rechtecke sind orange, die innerhalb des Kreises sind.

12EFO: Weniger als die Hälfte der Rechtecke sind orange, die außerhalb des Kreises sind.

12FMN: Mehr als die Hälfte der Rechtecke sind orange.

12FFN: Weniger als die Hälfte der Rechtecke sind orange.

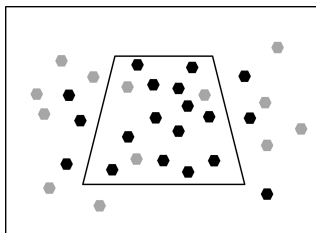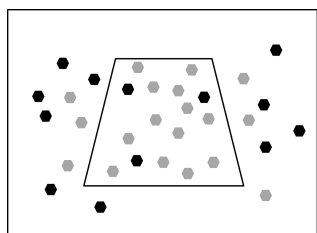

13EMI: Mehr als die Hälfte der Sechsecke sind schwarz, die innerhalb des Trapezes sind.

13EMO: Mehr als die Hälfte der Sechsecke sind schwarz, die außerhalb des Trapezes sind.

13EFI: Weniger als die Hälfte der Sechsecke sind schwarz, die innerhalb des Trapezes sind.

13EFO: Weniger als die Hälfte der Sechsecke sind schwarz, die außerhalb des Trapezes sind.

13FMN: Mehr als die Hälfte der Sechsecke sind schwarz.

13FFN: Weniger als die Hälfte der Sechsecke sind schwarz.

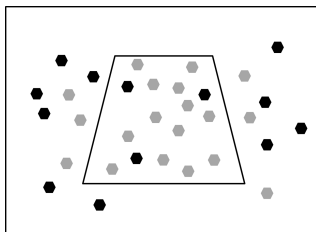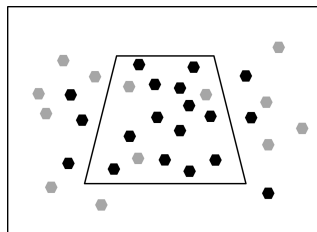

14EMI: Mehr als die Hälfte der Sechsecke sind grau, die innerhalb des Trapezes sind.

14EMO: Mehr als die Hälfte der Sechsecke sind grau, die außerhalb des Trapezes sind.

14EFI: Weniger als die Hälfte der Sechsecke sind grau, die innerhalb des Trapezes sind.

14EFO: Weniger als die Hälfte der Sechsecke sind grau, die außerhalb des Trapezes sind.

14FMN: Mehr als die Hälfte der Sechsecke sind grau.

14FFN: Weniger als die Hälfte der Sechsecke sind grau.

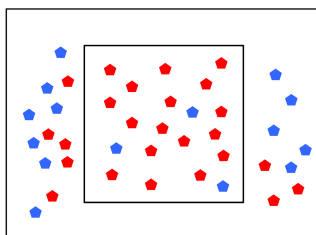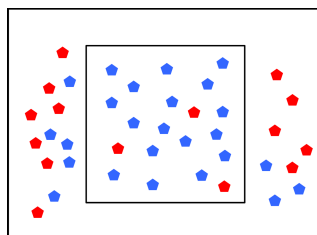

15EMI: Mehr als die Hälfte der Fünfecke sind rot, die innerhalb des Quadrats sind.

15EMO: Mehr als die Hälfte der Fünfecke sind rot, die außerhalb des Quadrats sind.

15EFI: Weniger als die Hälfte der Fünfecke sind rot, die innerhalb des Quadrats sind.

15EFO: Weniger als die Hälfte der Fünfecke sind rot, die außerhalb des Quadrats sind.

15FMN: Mehr als die Hälfte der Fünfecke sind rot.

15FFN: Weniger als die Hälfte der Fünfecke sind rot.

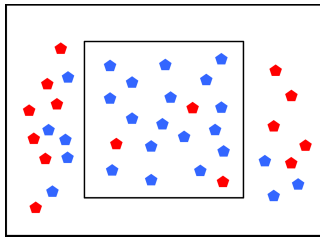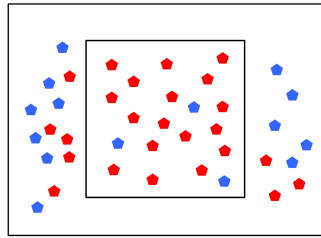

16EMI: Mehr als die Hälfte der Fünfecke sind blau, die innerhalb des Quadrats sind.

16EMO: Mehr als die Hälfte der Fünfecke sind blau, die außerhalb des Quadrats sind.

16EFI: Weniger als die Hälfte der Fünfecke sind blau, die innerhalb des Quadrats sind.

16EFO: Weniger als die Hälfte der Fünfecke sind blau, die außerhalb des Quadrats sind.

16FMN: Mehr als die Hälfte der Fünfecke sind blau.

16FFN: Weniger als die Hälfte der Fünfecke sind blau.

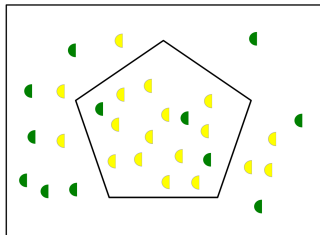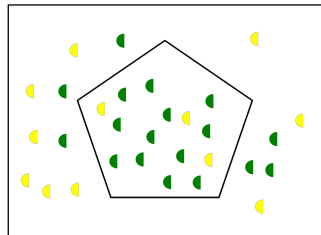

17EMI: Mehr als die Hälfte der Halbkreise sind gelb, die innerhalb des Fünfecks sind.

17EMO: Mehr als die Hälfte der Halbkreise sind gelb, die außerhalb des Fünfecks sind.

17EFI: Weniger als die Hälfte der Halbkreise sind gelb, die innerhalb des Fünfecks sind.

17EFO: Weniger als die Hälfte der Halbkreise sind gelb, die außerhalb des Fünfecks sind.

17FMN: Mehr als die Hälfte der Halbkreise sind gelb.

17FFN: Weniger als die Hälfte der Halbkreise sind gelb.

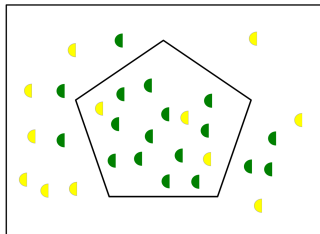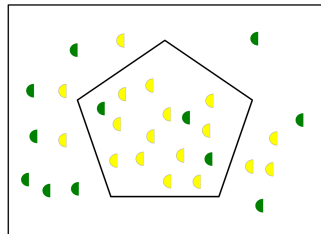

18EMI: Mehr als die Hälfte der Halbkreise sind grün, die innerhalb des Fünfecks sind.

18EMO: Mehr als die Hälfte der Halbkreise sind grün, die außerhalb des Fünfecks sind.

18EFI: Weniger als die Hälfte der Halbkreise sind grün, die innerhalb des Fünfecks sind.

18EFO: Weniger als die Hälfte der Halbkreise sind grün, die außerhalb des Fünfecks sind.

18FMN: Mehr als die Hälfte der Halbkreise sind grün.

18FFN: Weniger als die Hälfte der Halbkreise sind grün.

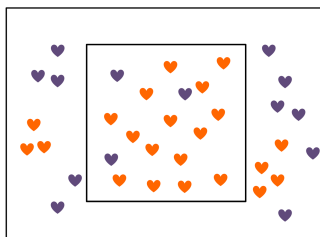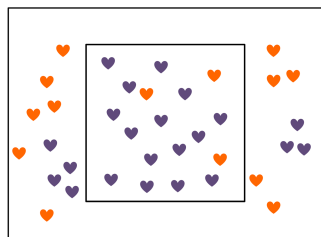

19EMI: Mehr als die Hälfte der Herzen sind orange, die innerhalb des Quadrats sind.

19EMO: Mehr als die Hälfte der Herzen sind orange, die außerhalb des Quadrats sind.

19EFI: Weniger als die Hälfte der Herzen sind orange, die innerhalb des Quadrats sind.

19EFO: Weniger als die Hälfte der Herzen sind orange, die außerhalb des Quadrats sind.

19FMN: Mehr als die Hälfte der Herzen sind orange.

19FFN: Weniger als die Hälfte der Herzen sind orange.

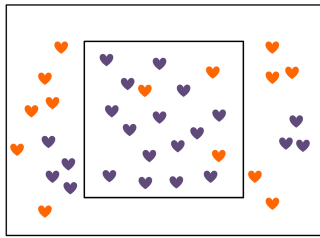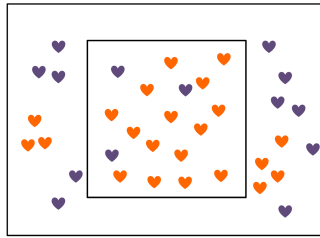

20EMI: Mehr als die Hälfte der Herzen sind lila, die innerhalb des Quadrats sind.

20EMO: Mehr als die Hälfte der Herzen sind lila, die außerhalb des Quadrats sind.

20EFI: Weniger als die Hälfte der Herzen sind lila, die innerhalb des Quadrats sind.

20EFO: Weniger als die Hälfte der Herzen sind lila, die außerhalb des Quadrats sind.

20FMN: Mehr als die Hälfte der Herzen sind lila.

20FFN: Weniger als die Hälfte der Herzen sind lila.
