# Supplementary material
Source: publisher figshare collection journal article supplement (https://tandf.figshare.com/articles/dataset/_/11822067)
Supplement: Supplementary file 2 [file 1]

### Supplement 3: Additional analysis excluding incorrectly answered trials

For our analyses, we excluded all participants in the final analyses with less than 50% data points in each of the experimental conditions. While this procedure affected eight participants when incorrectly answered trials were included, it affected an additional seven participants when incorrectly answered trials were excluded. Thus, the current additional ERP and reaction time analyses were carried out with  $n = 16$  participants.

#### 1. ERP analyses

##### Adjective

Statistical results: ANOVA with the factors CONTEXT, QUANTIFIER and ROI:

##### 300-400 ms

- CONTEXT:  $F(1,15) = 15.10$ ;  $p < .01$
- QUANTIFIER:  $F(1,15) = 0.17$ ;  $p = .69$
- CONTEXT x ROI:  $F(3,45) = 3.53$ ;  $p < .05$
- QUANTIFIER x ROI:  $F(3,45) = 1.98$ ;  $p = .13$
- CONTEXT x QUANTIFIER:  $F(1,15) = 3.85$ ;  $p = .07$
- ROI x CONTEXT x QUANTIFIER:  $F(3,45) = 9.02$ ;  $p = .001$

|                   | Roi1: Left anterior           | Roi2: Right anterior           | Roi3: Left posterior            | Roi4: Right posterior          |
|-------------------|-------------------------------|--------------------------------|---------------------------------|--------------------------------|
| CONTEXT x         |                               |                                |                                 |                                |
| QUANTIFIER        | $F(1,15) = 3.38$ ; $p = .09$  | $F(1,15) = 1.67$ ; $p = .22$   | $F(1,15) = 4.71$ ; $p < .05$    | $F(1,15) = 5.62$ ; $p < .05$   |
| A vs. B: positive | $F(1,15) = 18.62$ ; $p < .01$ | $F(1,15) = 13.93$ ; $p < .01$  | $F(11,15) = 28.49$ ; $p < .001$ | $F(1,15) = 32.09$ ; $p < .001$ |
| A vs. B: negative | $F(1,15) = 0.09$ ; $p = .77$  | $F(1,15) = 0.69$ ; $p = .42$   | $F(1,15) = 0.07$ ; $p = .80$    | $F(1,15) = 0.06$ ; $p = .82$   |
| CONTEXT           | $F(1,15) = 13.43$ ; $p < .1$  | $F(1,15) = 15.35$ ; $p = .001$ | $F(1,15) = 12.17$ ; $p < .01$   | $F(1,15) = 15.45$ ; $p = .001$ |
| QUANTIFIER        | $F(1,15) = 0.61$ ; $p = .45$  | $F(1,15) = 0.30$ ; $p = .60$   | $F(1,15) = 0.70$ ; $p = .41$    | $F(1,15) = 0.03$ ; $p = .87$   |

##### 450-800 ms

- CONTEXT:  $F(1,15) = 7.28$ ;  $p < .05$
- QUANTIFIER:  $F(1,15) = 0.08$ ;  $p = .79$
- CONTEXT x ROI:  $F(3,45) = 5.08$ ;  $p < .05$
- QUANTIFIER x ROI:  $F(3,45) = 0.31$ ;  $p = .82$
- CONTEXT x QUANTIFIER:  $F(1,15) = 6.39$ ;  $p < .05$ 
  - A vs. B: positive:  $F(1,15) = 10.54$ ;  $p < .01$
  - A vs. B: negative:  $F(1,15) = 1.79$ ;  $p = .20$
- ROI x CONTEXT x QUANTIFIER:  $F(3,45) = 1.44$ ;  $p = .25$

|                   | Roi1: Left anterior          | Roi2: Right anterior         | Roi3: Left posterior           | Roi4: Right posterior         |
|-------------------|------------------------------|------------------------------|--------------------------------|-------------------------------|
| CONTEXT x         |                              |                              |                                |                               |
| QUANTIFIER        | $F(1,15) = 2.70$ ; $p = .12$ | $F(1,15) = 2.11$ ; $p = .17$ | $F(1,15) = 11.54$ ; $p < .01$  | $F(1,15) = 8.09$ ; $p < .05$  |
| A vs. B: positive | $F(1,15) = 5.99$ ; $p < .05$ | $F(1,15) = 6.21$ ; $p < .05$ | $F(11,15) = 11.93$ ; $p < .01$ | $F(1,15) = 12.06$ ; $p < .01$ |
| A vs. B: negative | $F(1,15) = 0.72$ ; $p = .41$ | $F(1,15) = 0.36$ ; $p = .56$ | $F(1,15) = 2.06$ ; $p = .17$   | $F(1,15) = 2.35$ ; $p = .15$  |
| CONTEXT           | $F(1,15) = 4.31$ ; $p = .06$ | $F(1,15) = 5.45$ ; $p < .05$ | $F(1,15) = 7.28$ ; $p < .05$   | $F(1,15) = 8.08$ ; $p < .05$  |
| QUANTIFIER        | $F(1,15) = 0.08$ ; $p = .79$ | $F(1,15) = 0.11$ ; $p = .74$ | $F(1,15) = 0.01$ ; $p = .94$   | $F(1,15) = 0.24$ ; $p = .63$  |

ERPs from adjective onset, *more than half*. Incorrectly answered trials were excluded from these grand averages.

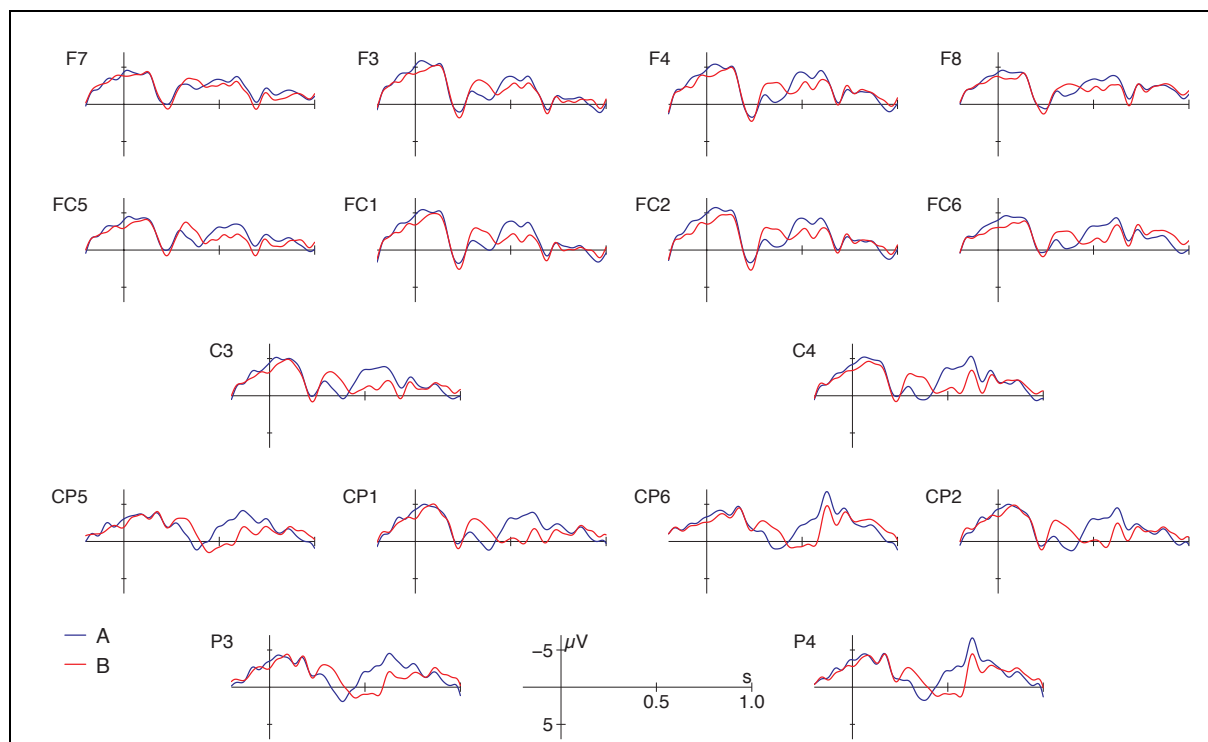

ERPs from adjective onset, *fewer than half*. Incorrectly answered trials were excluded from these grand averages.

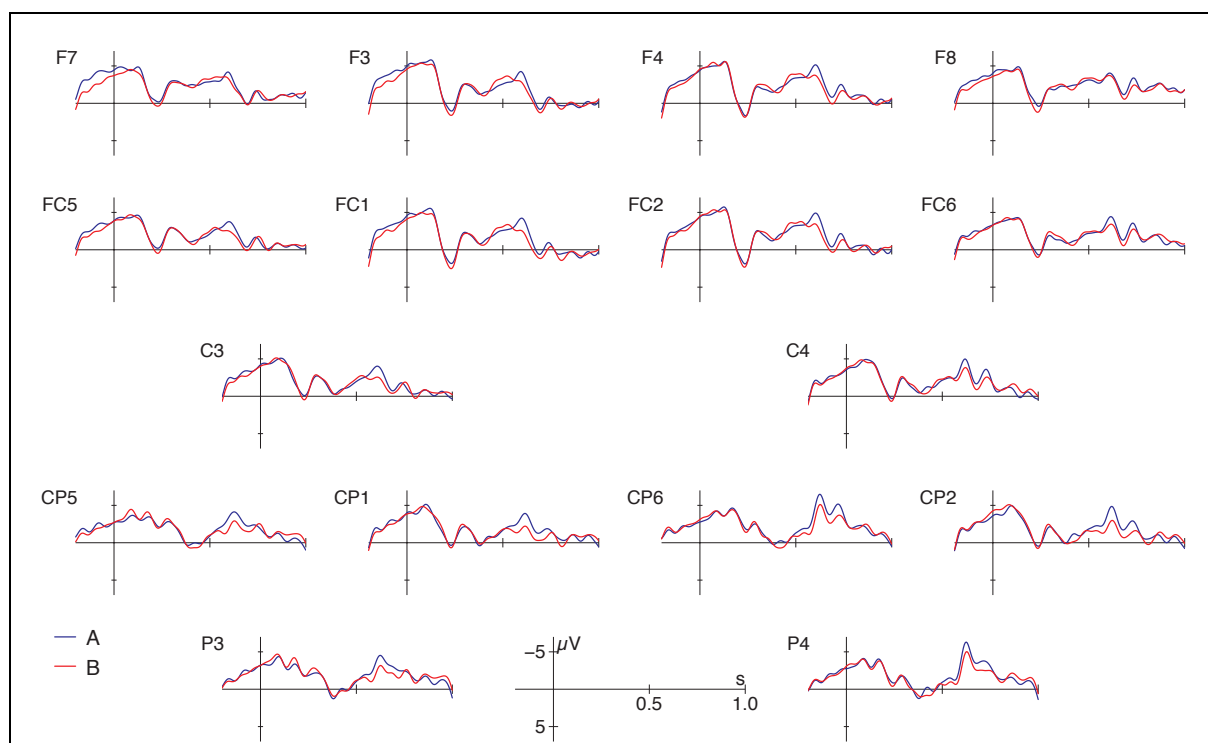

## Preposition

### 300-400 ms

- TRUTH:  $F(1,15) = 5.33$ ;  $p < .05$
- QUANTIFIER:  $F(1,15) = 4.35$ ;  $p = .05$
- TRUTH x ROI:  $F(3,45) = 5.09$ ;  $p < .01$
- QUANTIFIER x ROI:  $F(3,45) = 1.05$ ;  $p = .38$
- TRUTH x QUANTIFIER:  $F(1,15) = 1.93$ ;  $p = .19$
- ROI x TRUTH x QUANTIFIER:  $F(3,45) = 4.19$ ;  $p < .05$

|                   | Roi1: Left anterior          | Roi2: Right anterior          | Roi3: Left posterior           | Roi4: Right posterior         |
|-------------------|------------------------------|-------------------------------|--------------------------------|-------------------------------|
| TRUTH x           |                              |                               |                                |                               |
| QUANTIFIER        | $F(1,15) = 0.60$ ; $p = .45$ | $F(1,15) = 3.11$ ; $p = .10$  | $F(1,15) = 1.46$ ; $p = .24$   | $F(1,15) = 2.81$ ; $p = .11$  |
| A vs. B: positive | $F(1,15) = 6.03$ ; $p < .05$ | $F(1,15) = 10.21$ ; $p < .01$ | $F(11,15) = 11.57$ ; $p < .01$ | $F(1,15) = 12.35$ ; $p < .01$ |
| A vs. B: negative | $F(1,15) = 0.74$ ; $p = .40$ | $F(1,15) = 0.02$ ; $p = .88$  | $F(1,15) = 1.02$ ; $p = .33$   | $F(1,15) = 0.21$ ; $p = .65$  |
| TRUTH             | $F(1,15) = 4.28$ ; $p = .06$ | $F(1,15) = 3.38$ ; $p = .09$  | $F(1,15) = 7.45$ ; $p < .05$   | $F(1,15) = 5.39$ ; $p < .05$  |
| QUANTIFIER        | $F(1,15) = 1.69$ ; $p = .21$ | $F(1,15) = 6.32$ ; $p < .05$  | $F(1,15) = 3.75$ ; $p = .07$   | $F(1,15) = 5.55$ ; $p < .05$  |

### 450-800 ms

- TRUTH:  $F(1,15) = 1.03$ ;  $p = .33$
- QUANTIFIER:  $F(1,15) = 2.75$ ;  $p = .12$
- TRUTH x ROI:  $F(3,45) = 0.67$ ;  $p = .57$
- QUANTIFIER x ROI:  $F(3,45) = 2.64$ ;  $p = .06$
- TRUTH x QUANTIFIER:  $F(1,15) = 0.11$ ;  $p = .74$
- ROI x TRUTH x QUANTIFIER:  $F(3,45) = 0.16$ ;  $p = .93$

ERPs from preposition onset, *more than half*. Incorrectly answered trials were excluded from these grand averages.

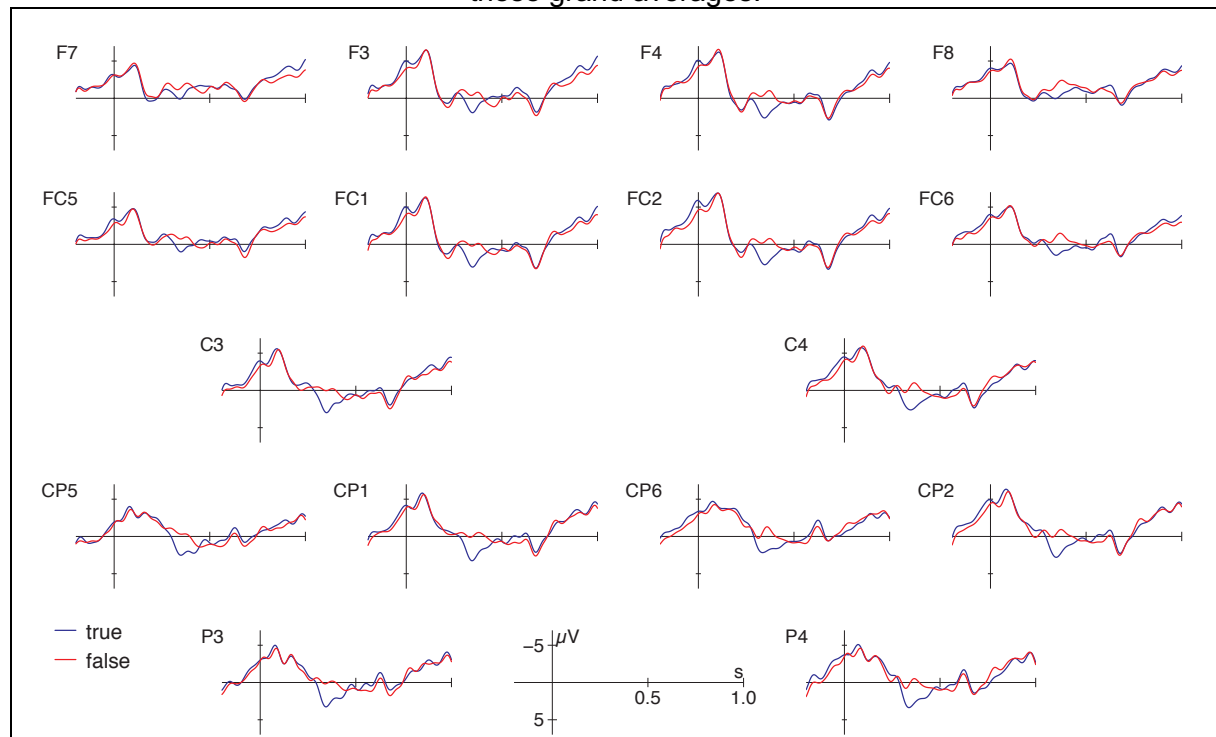

ERPs from preposition onset, *fewer than half*. Incorrectly answered trials were excluded from these grand averages.

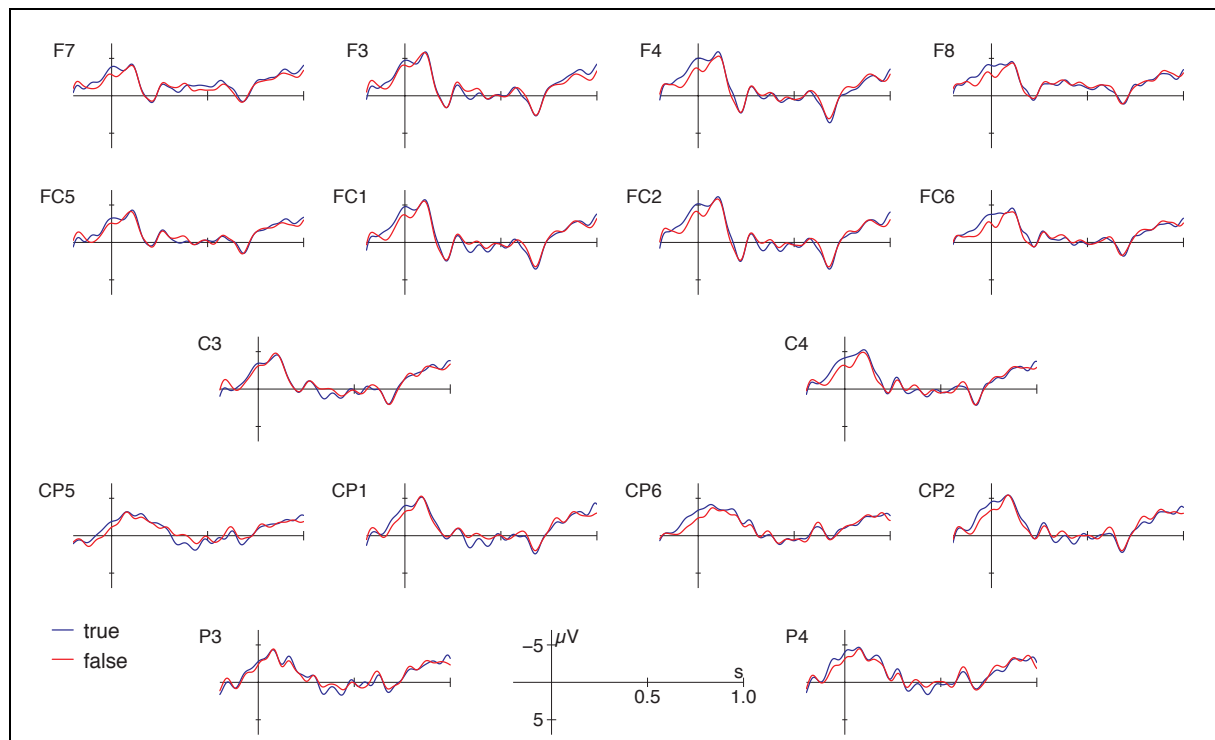

## Quantifier

### 300-400 ms

- QUANTIFIER:  $F(1,15) = 3.07$ ;  $p = .1$
- ROI x QUANTIFIER:  $F(3,45) = 0.21$ ;  $p = .89$

### 450-800 ms

- QUANTIFIER:  $F(1,15) = 3.68$ ;  $p = .07$
- ROI x QUANTIFIER:  $F(3,45) = 3.73$ ;  $p = .05$

|            | Roi1: Left anterior          | Roi2: Right anterior         | Roi3: Left posterior         | Roi4: Right posterior        |
|------------|------------------------------|------------------------------|------------------------------|------------------------------|
| QUANTIFIER | $F(1,15) = 0.87$ ; $p = .37$ | $F(1,15) = 0.03$ ; $p = .86$ | $F(1,15) = 8.06$ ; $p < .05$ | $F(1,15) = 7.31$ ; $p = .05$ |

ERPs from quantifier onset. Incorrectly answered trials were excluded from these grand averages.

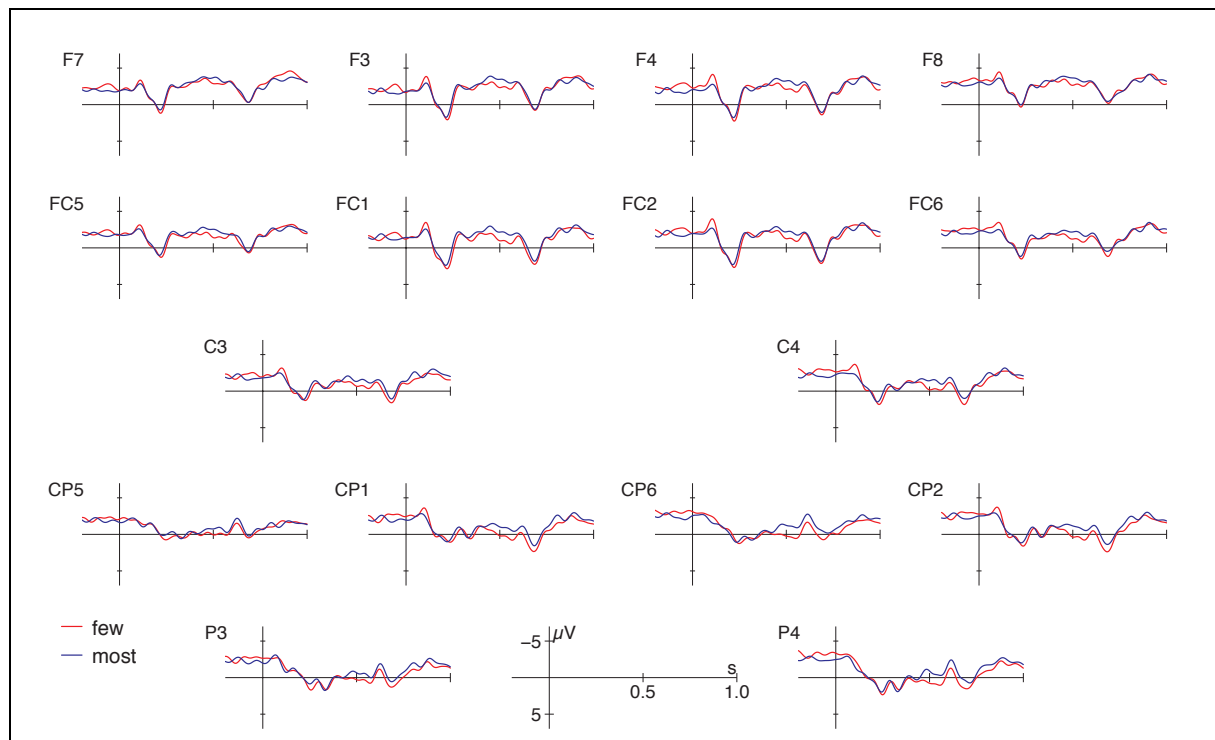

## 2. Reaction times

Behavioural results for the single conditions.

| Condition | Reaction times |       |
|-----------|----------------|-------|
|           | ms             | SE    |
| APosI     | 358.8          | 18.74 |
| APosO     | 365.1          | 23.16 |
| ANegI     | 380.1          | 23.01 |
| ANegO     | 384.2          | 22.45 |
| BPosI     | 327.4          | 15.33 |
| BPosO     | 341.1          | 14.69 |
| BNegI     | 351.2          | 16.21 |
| BNegO     | 389.5          | 19.82 |

Statistical results: ANOVA with the factors CONTEXT, QUANTIFIER and PREPOSITION:

- QUANTIFIER:  $F(1,15) = 3.57$ ;  $p = .08$
- CONTEXT:  $F(1,15) = 5.31$ ;  $p < .05$
- PREPOSITION:  $F(1,15) = 6.67$ ;  $p < .05$
- All other  $p$  values  $> .39$
