# Supplementary material
Source: publisher figshare collection journal article supplement (https://tandf.figshare.com/articles/dataset/_/11822067)

**Supplement 2: Comparison between our original analysis (band-pass filtered data, no baseline correction) and the new analysis (unfiltered data, baseline correction (-200 ms to 0 ms)).**

Note that we applied a 05-Hz low-pass filter for the new analyses for illustration purposes and the sake of visual comparison.

Adjective, more than half

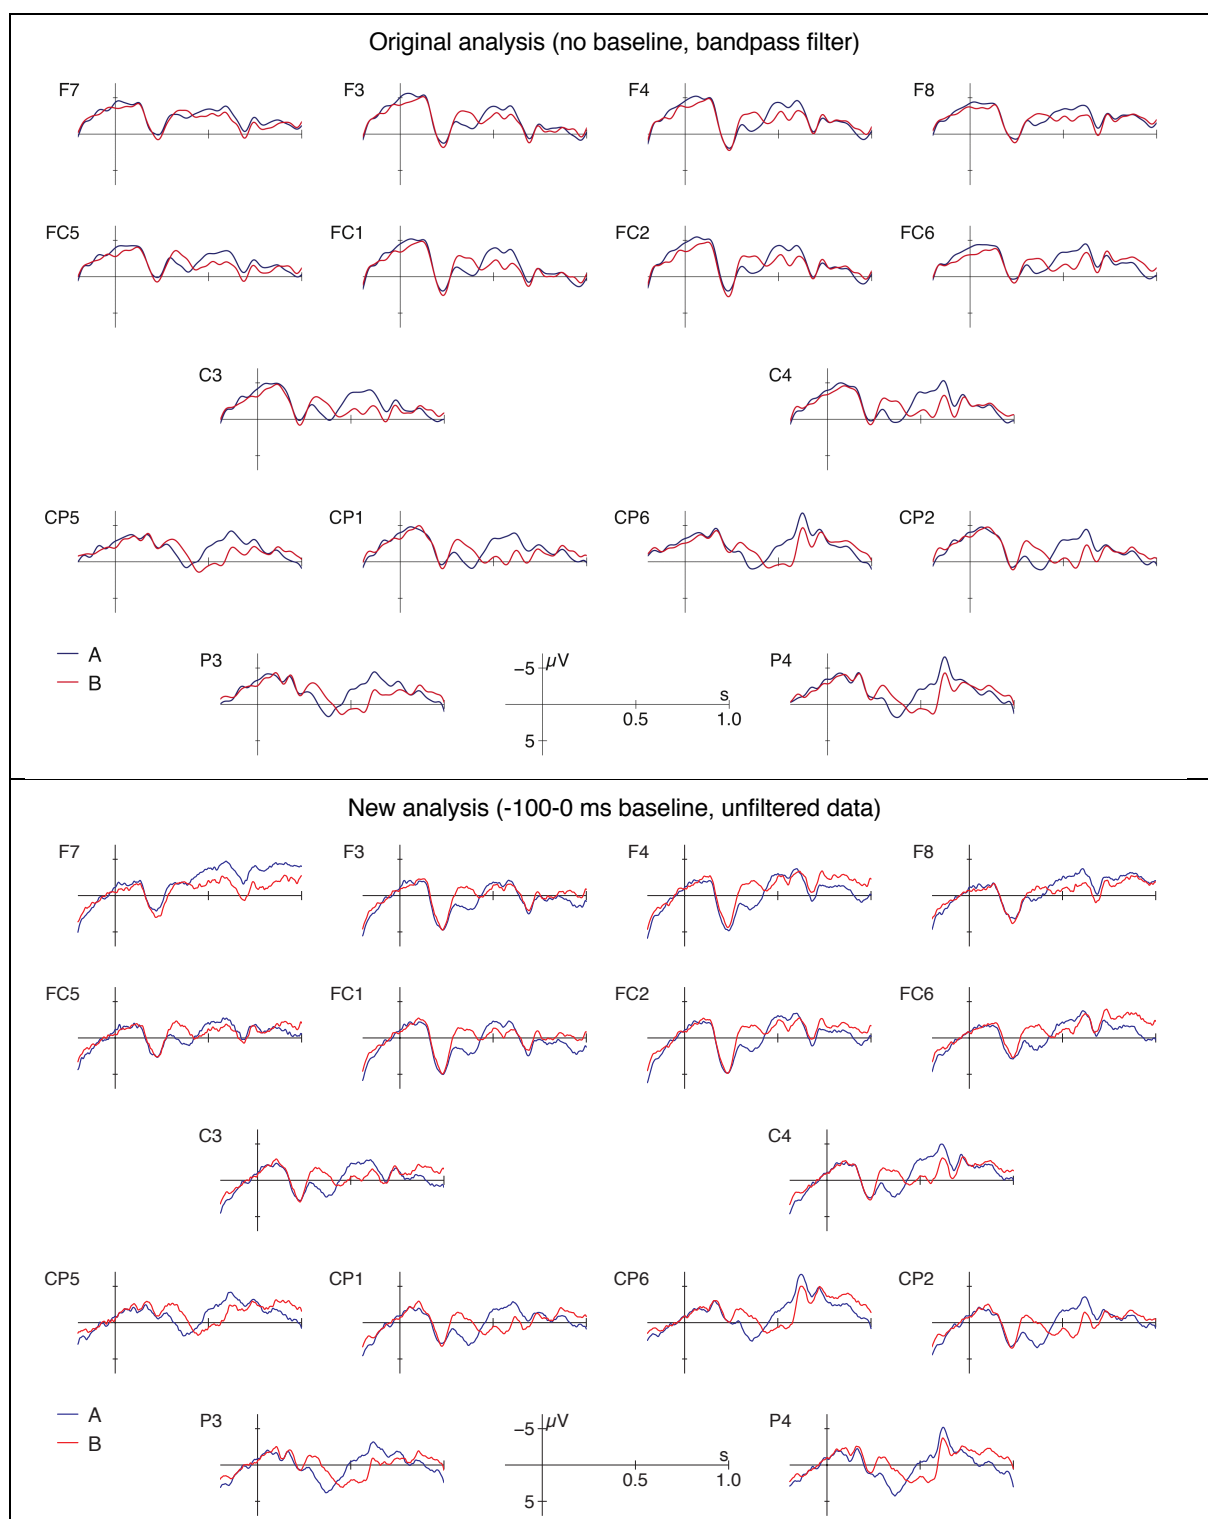

Adjective, fewer than half

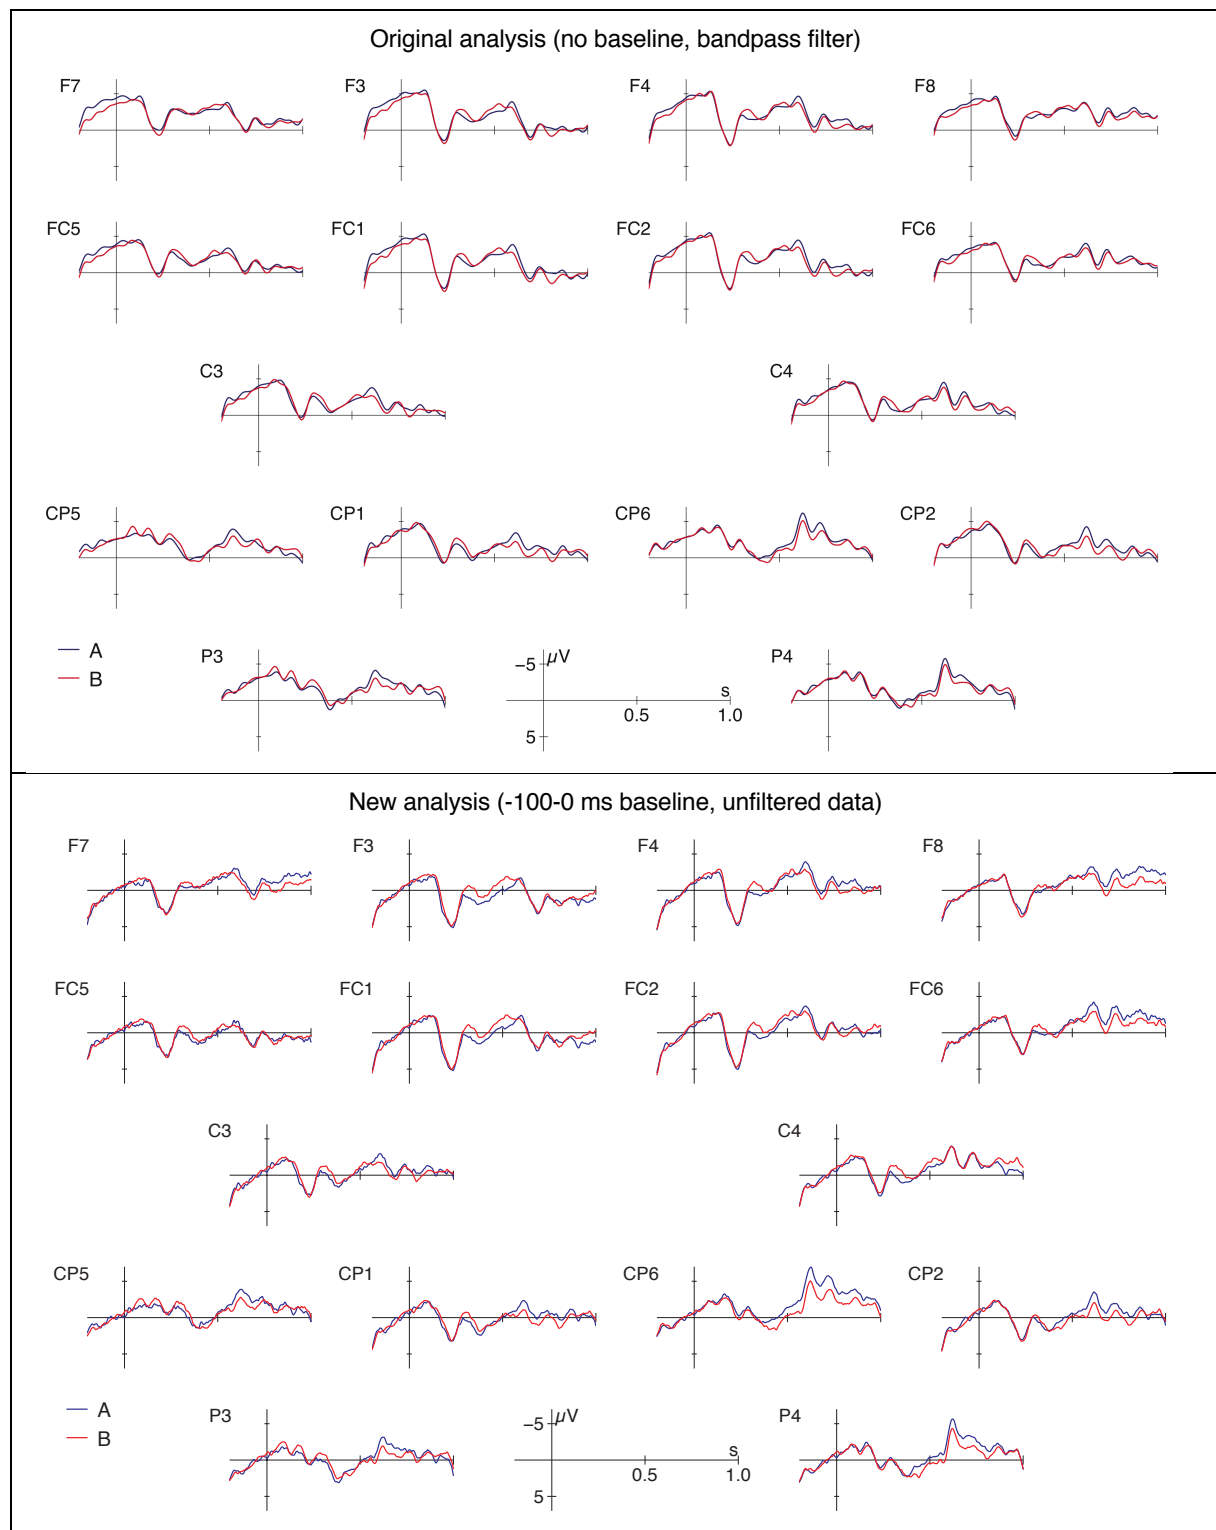

## Preposition, more than half

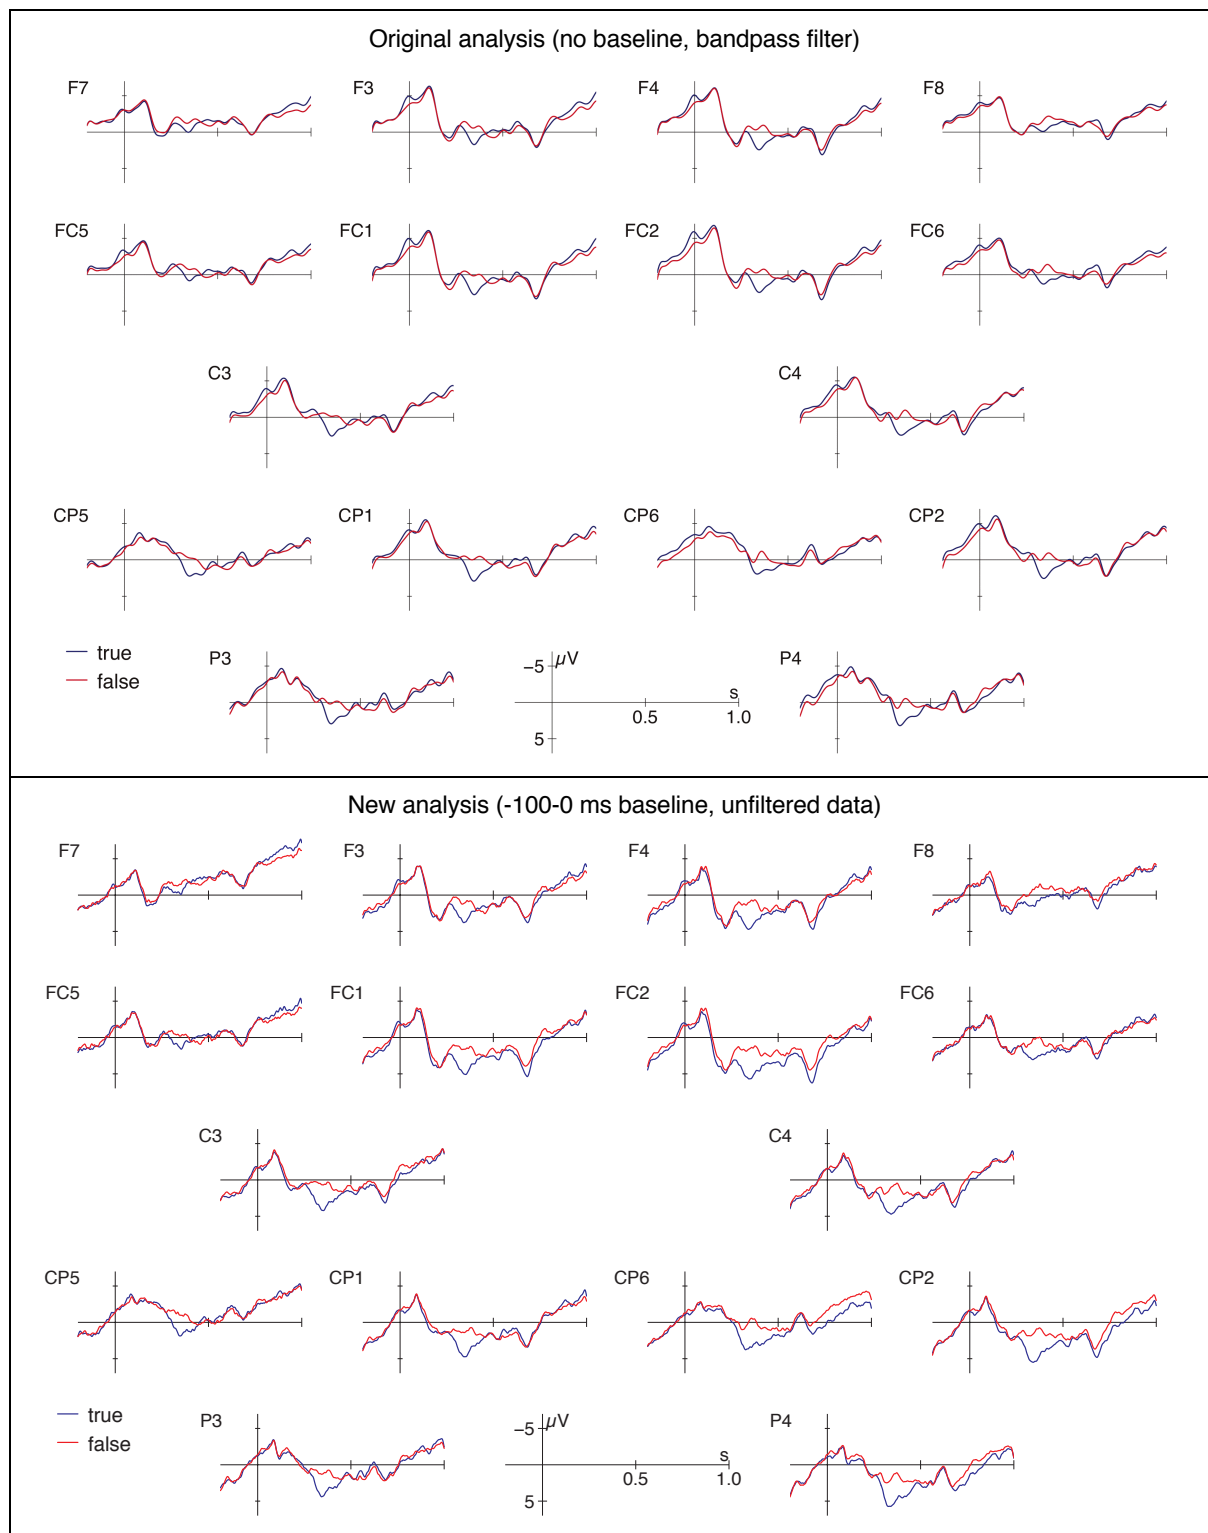

Preposition, fewer than half

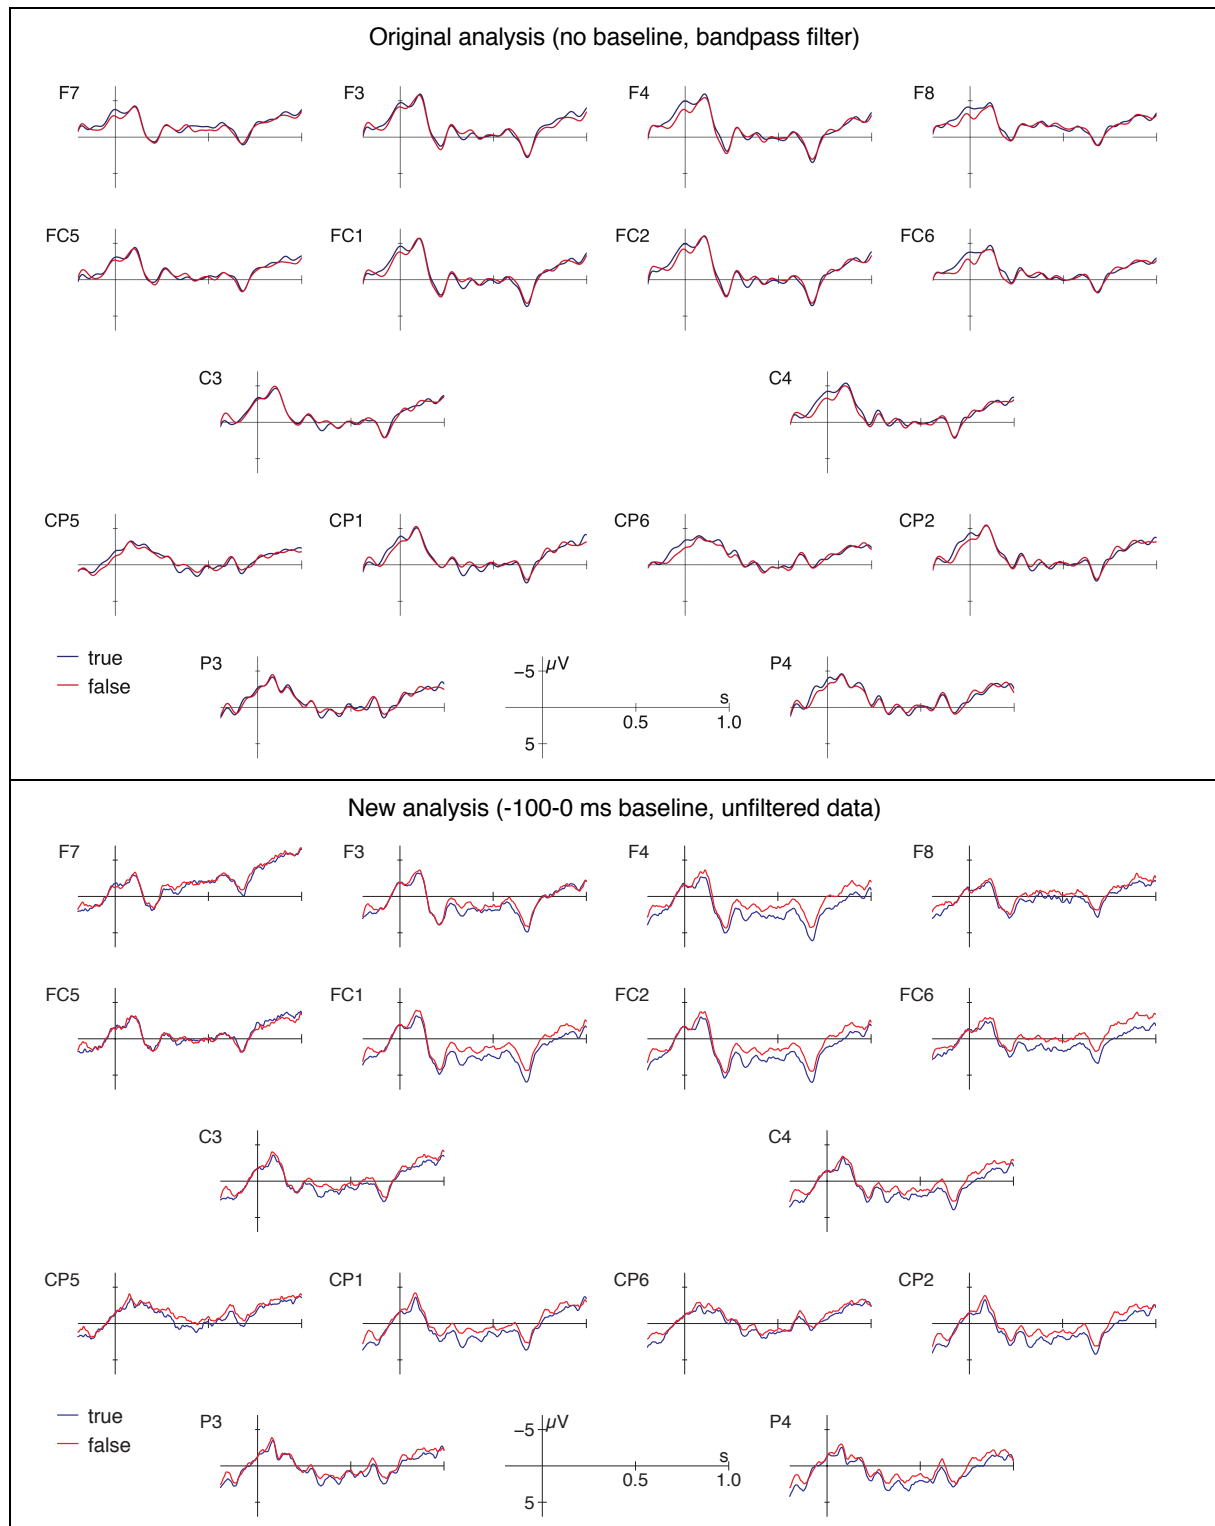

## Quantifier

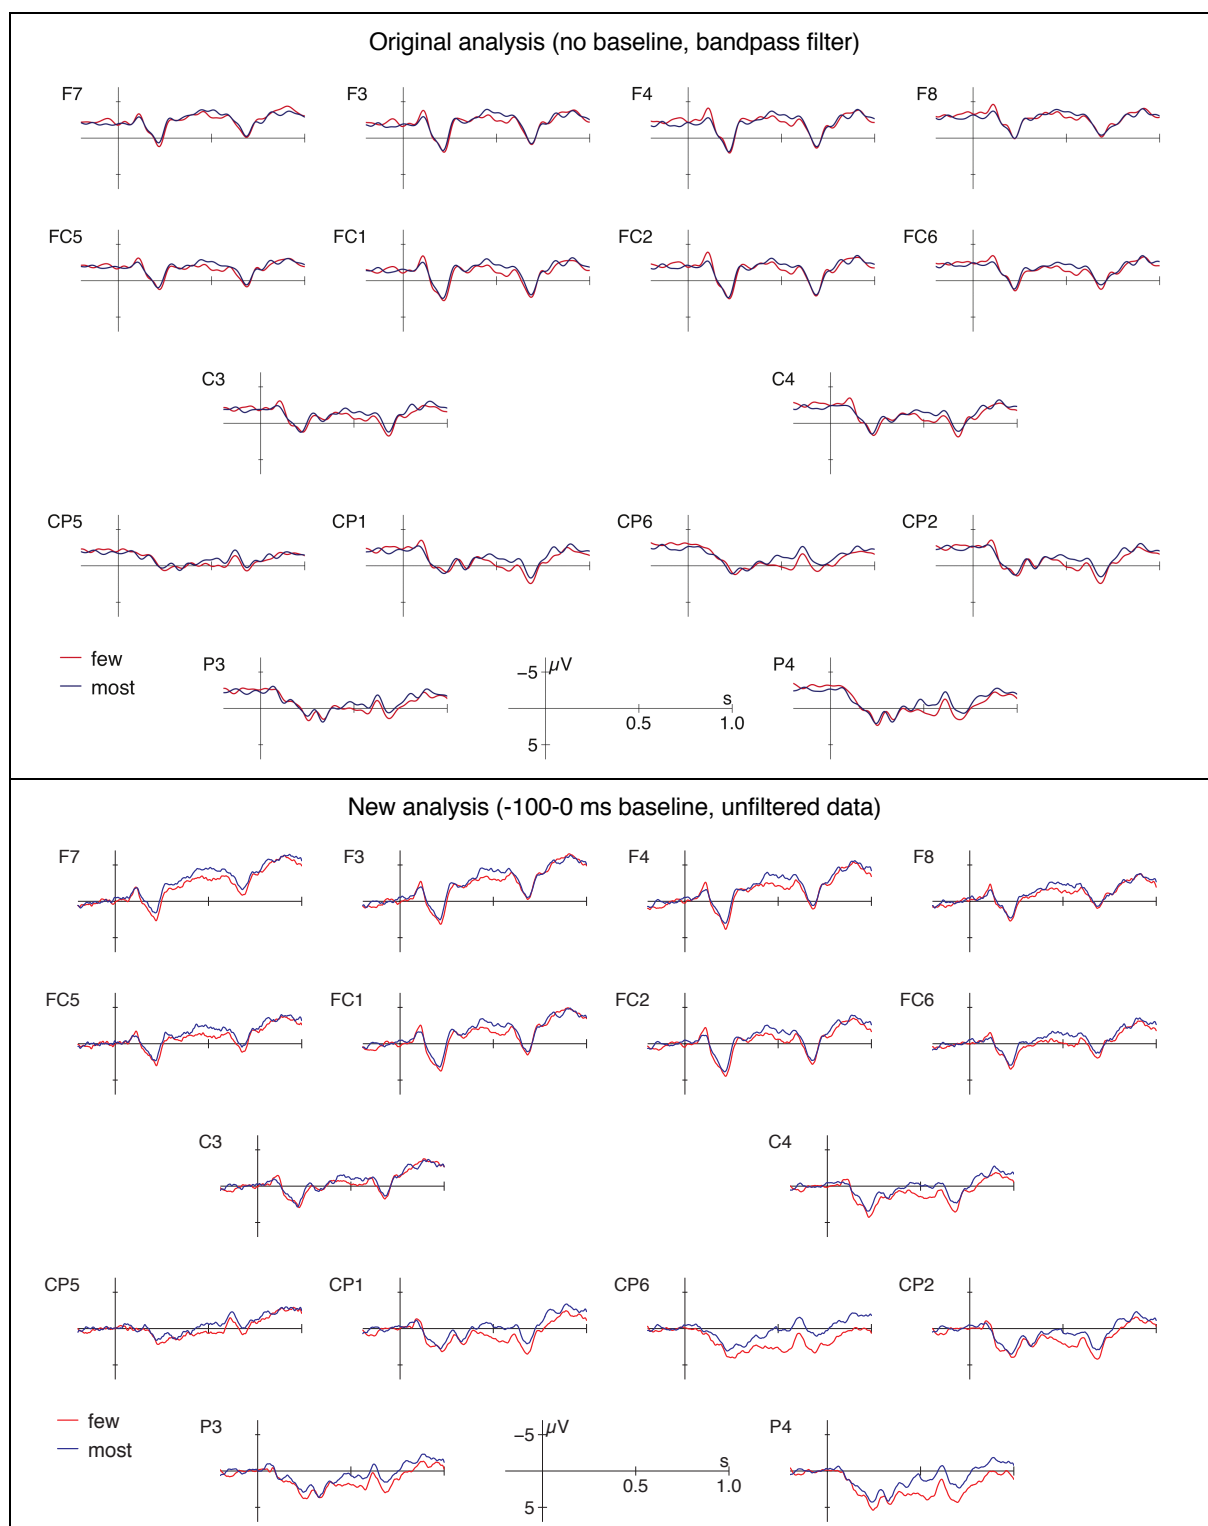

Supplement: Supplementary file 3 [file 1]
